# Supplementary material
Source: Springer Nature journal article supplement (https://www.springermedizin.de/resource/supplementary/13054_2013_2974_MOESM3_ESM.pdf/9712024)
Supplement: MOESM3 [file 9712024]

CONTROL PATIENTS

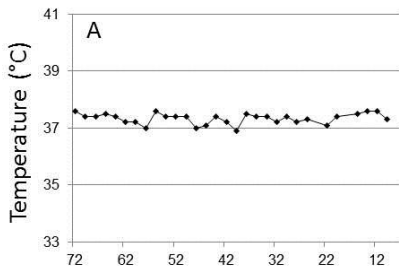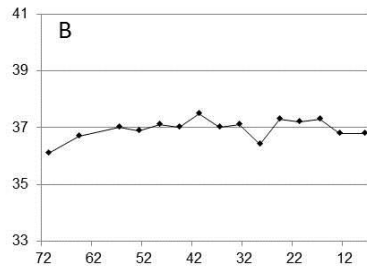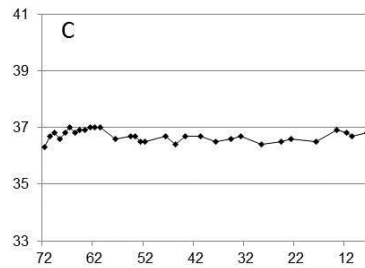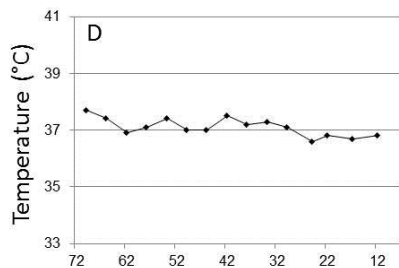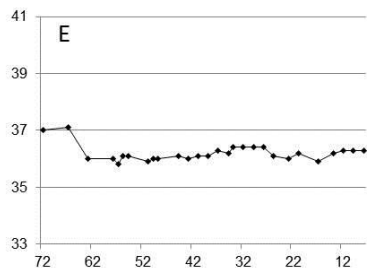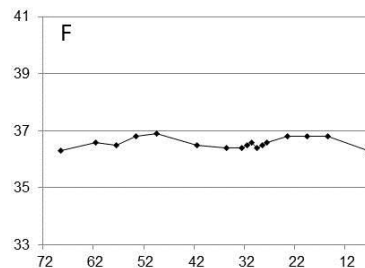

Hours prior to discharge from the ICU

SEPTIC PATIENTS

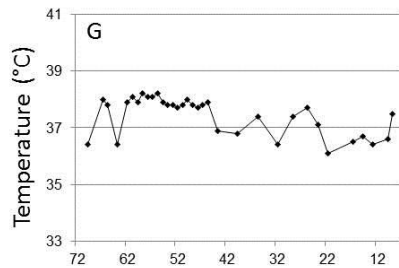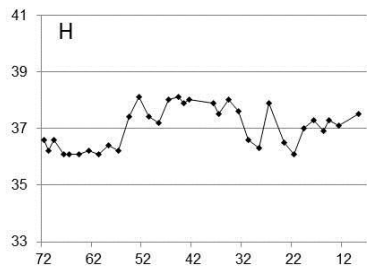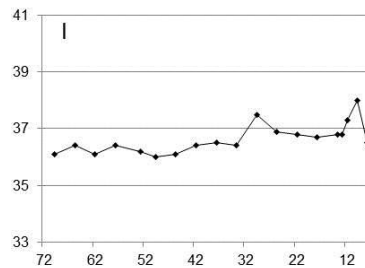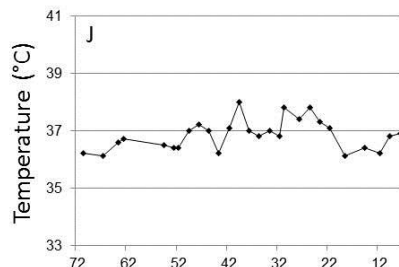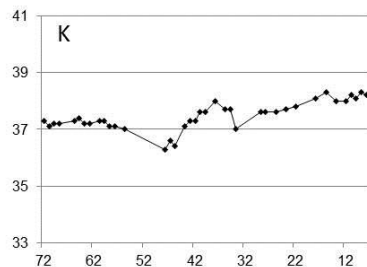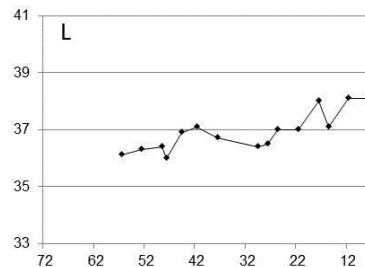

Hours prior to the first clinical suspicion of sepsis
